# Supplementary material for: Bilayer electrolyte design toward high-voltage durable solid-state lithium metal batteries
Source: Royal Society of Chemistry journal article supplement (doi:10.1039/d3qi02288a), 2024-01-01
Supplement: d3qi02288a1.pdf [file d3qi02288a1.pdf]

## Supplementary Information

### **Bilayer electrolyte design toward high-voltage durable solid-state lithium metal batteries**

Qiujun Wang <sup>a</sup>, Yaqing Wang <sup>a</sup>, Yanqiang Ma <sup>a</sup>, Di Zhang <sup>a</sup>, Zhaojin Li <sup>a</sup>, Huilan Sun <sup>a</sup>, Bo Wang <sup>a,\*</sup>,  
Dong Zhou <sup>b,\*</sup>, Li-Zhen Fan <sup>c,\*</sup>

<sup>a</sup> *Hebei Key Laboratory of Flexible Functional Materials, School of Materials Science and Engineering, Hebei University of Science and Technology, Shijiazhuang, 050000, China*

<sup>b</sup> *Tsinghua Shenzhen International Graduate School, Tsinghua University, Shenzhen 518055, China*

<sup>c</sup> *Beijing Advanced Innovation Center for Materials Genome Engineering, Institute of Advanced Materials and Technology, University of Science and Technology Beijing, Beijing 100083, China*

\*Corresponding author.

E-mail: [wangbo1996@gmail.com](mailto:wangbo1996@gmail.com) (B. Wang); [zhou.d@sz.tsinghua.edu.cn](mailto:zhou.d@sz.tsinghua.edu.cn) (D. Zhou);  
[fanlizhen@ustb.edu.cn](mailto:fanlizhen@ustb.edu.cn) (L.-Z. Fan)

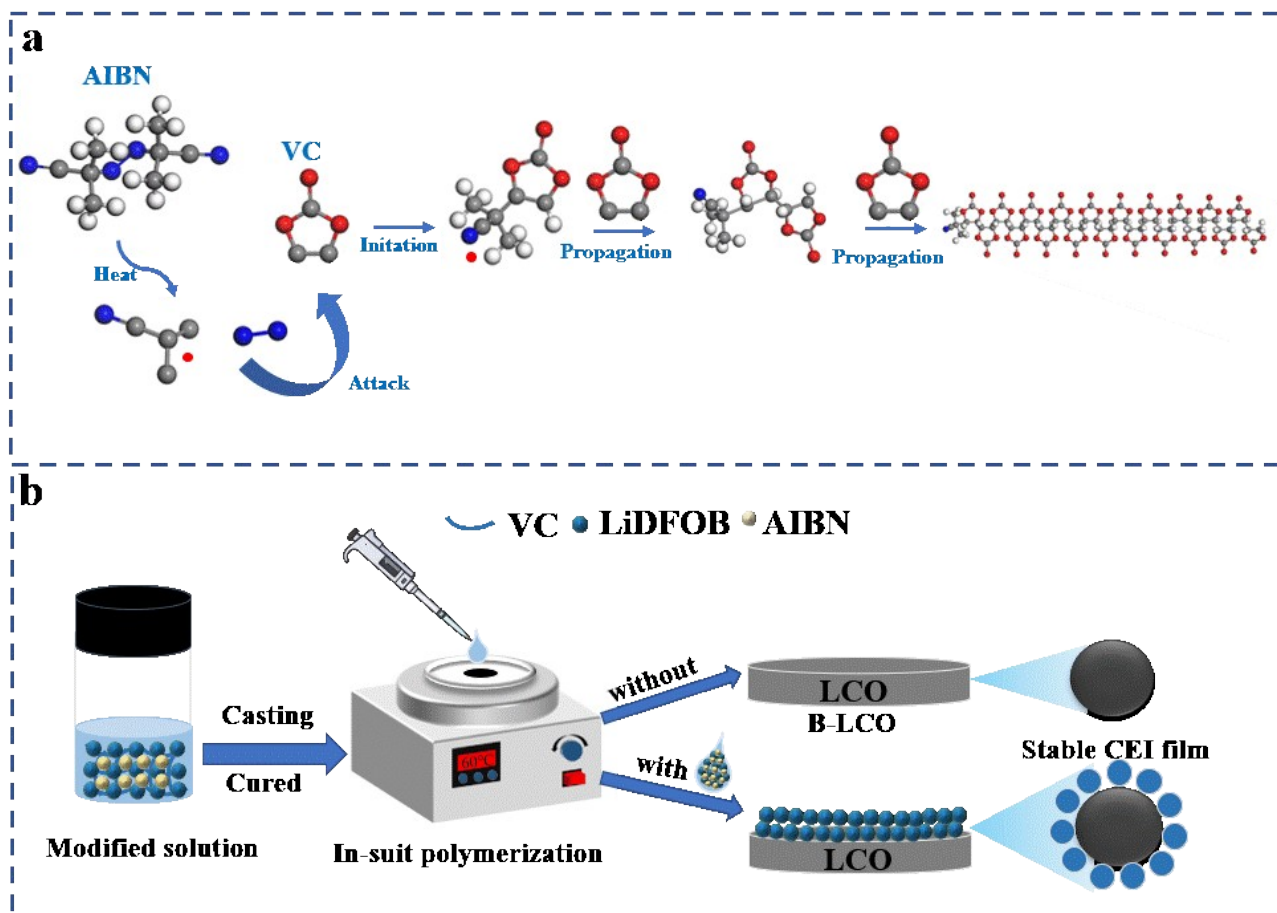

**Fig. S1.** (a) Mechanism for polymerization of VC. (b) Schematic illustration of preparation process of in-situ CEI coating.

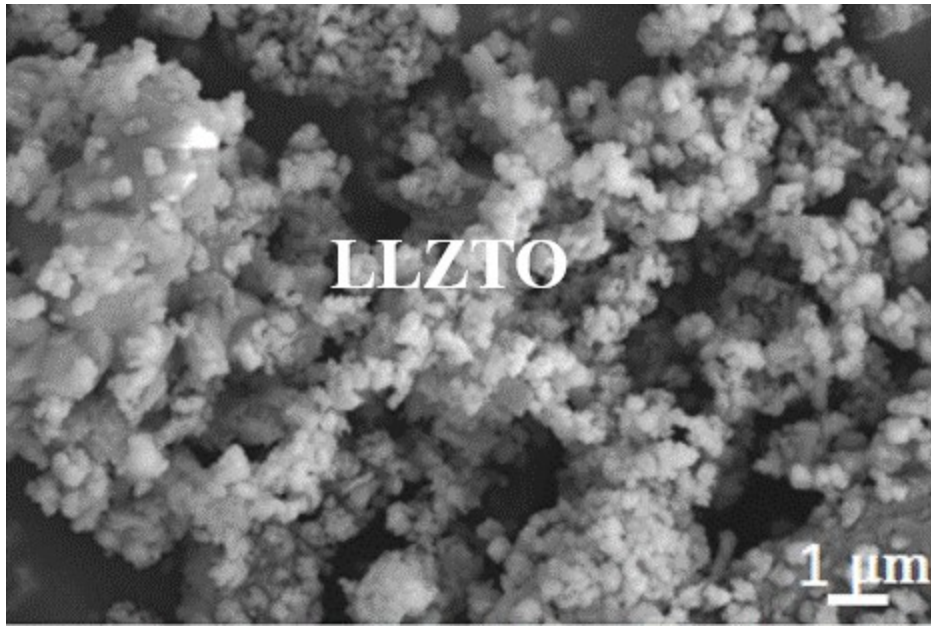

**Fig. S2.** SEM images of the LLZTO

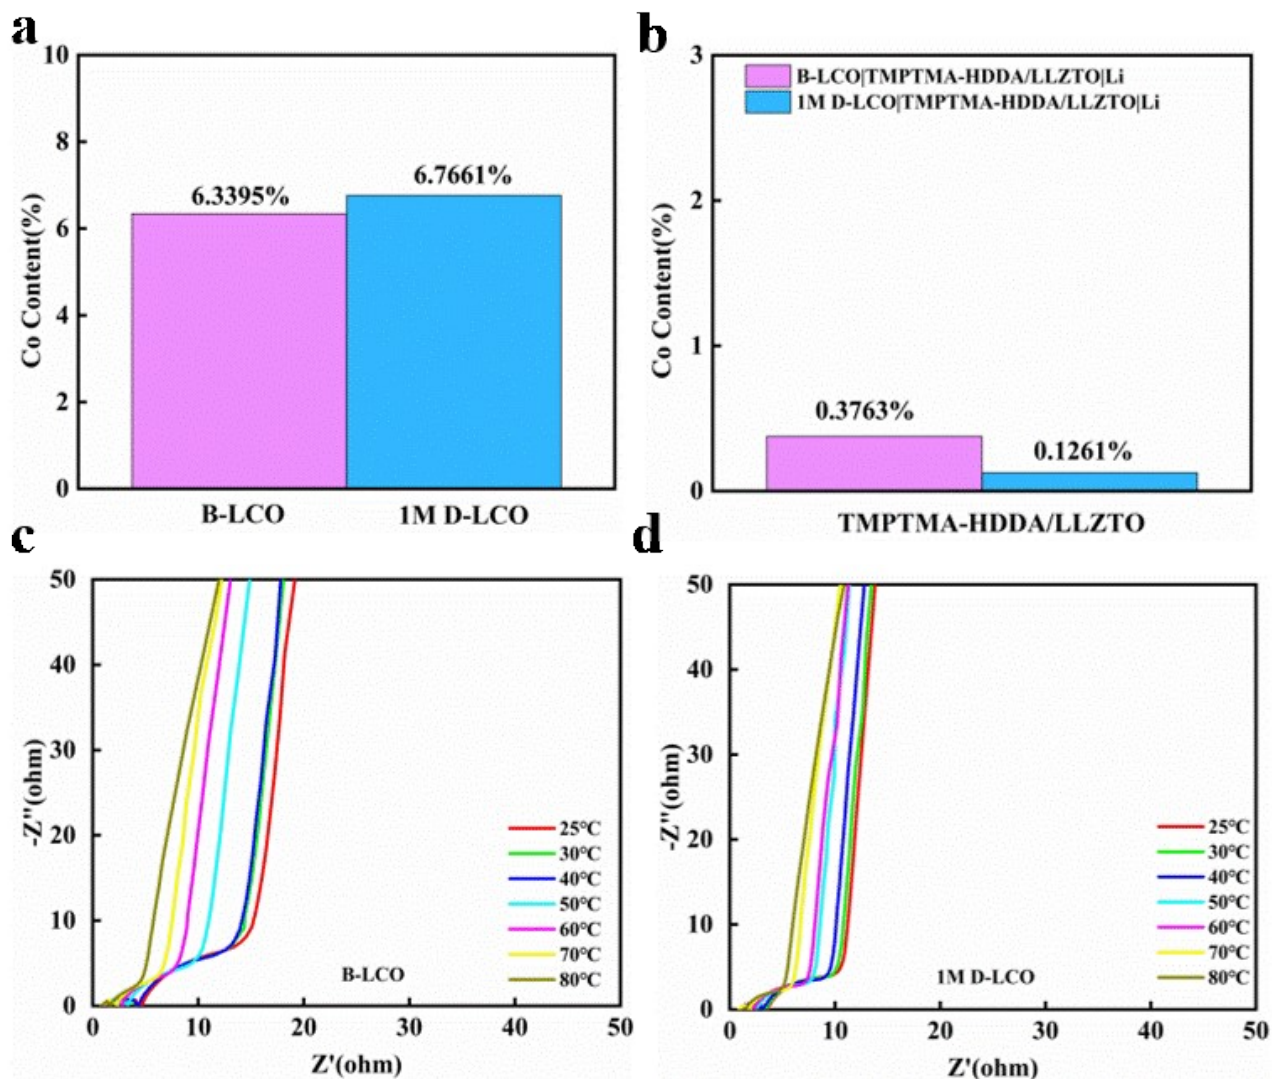

**Fig. S3.** (a) Comparison of Co content in B-LCO and 1M D-LCO after cycling (b) Comparison of Co content of TMPTMA-HDDA/LLZTO electrolyte in B-LCO|TMPTMA-HDDA/LLZTO|Li and 1M D-LCO|TMPTMA-HDDA/LLZTO|Li cells after cycling. Electrochemical impedance spectroscopy (EIS) of (c) B-LCO and (d) 1M D-LCO at different temperatures.

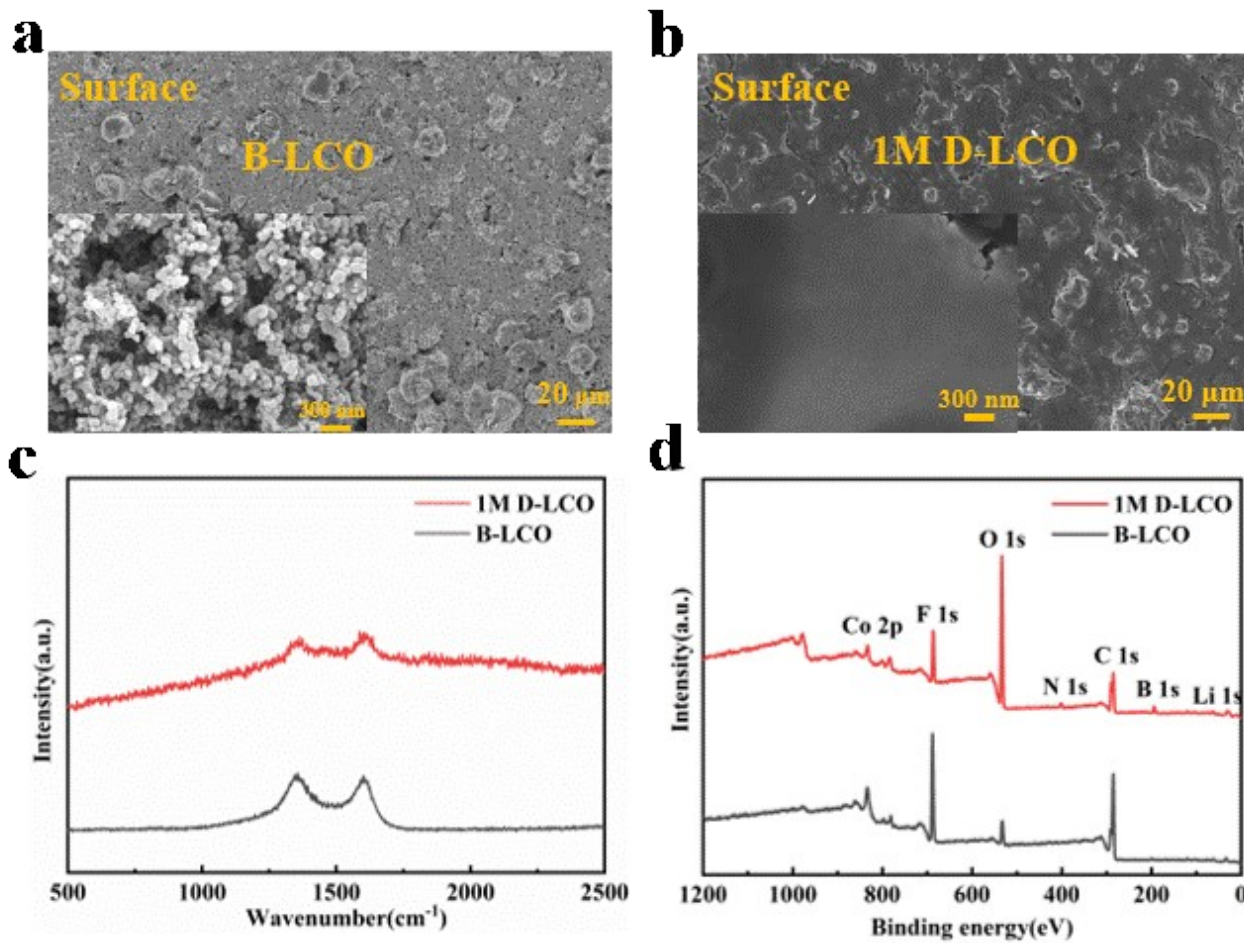

**Fig. S4.** The morphology SEM images of (a) B-LCO, (b) 1M D-LCO. (c) Raman spectra of B-LCO and 1M D-LCO. (d) XPS analysis of B-LCO and 1M D-LCO.



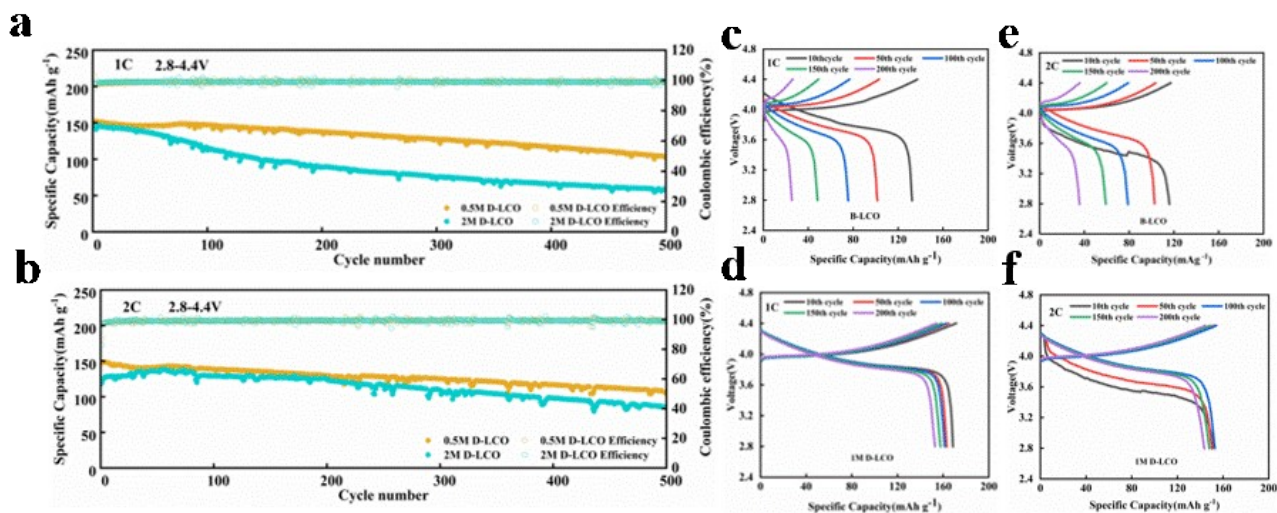

**Fig. S5.** The discharge capacity and coulombic efficiency of 0.5M D-LCO|TMPTMA-HDDA/LLZTO|Li, 2M D-LCO|TMPTMA-HDDA/LLZTO|Li, cells for 500 cycles at 2.8-4.4 V (a) at 1 C, (b) at 2 C. Charge-discharge curves of (c) B-LCO|TMPTMA-HDDA/LLZTO|Li and (d) 1M D-LCO|TMPTMA-HDDA/LLZTO|Li cells during cycling at 1 C at 2.8-4.4V. Charge-discharge curves of (e) B-LCO|TMPTMA-HDDA/LLZTO|Li and (f) 1M D-LCO|TMPTMA-HDDA/LLZTO|Li cells during cycling at 2 C at 2.8-4.4V.

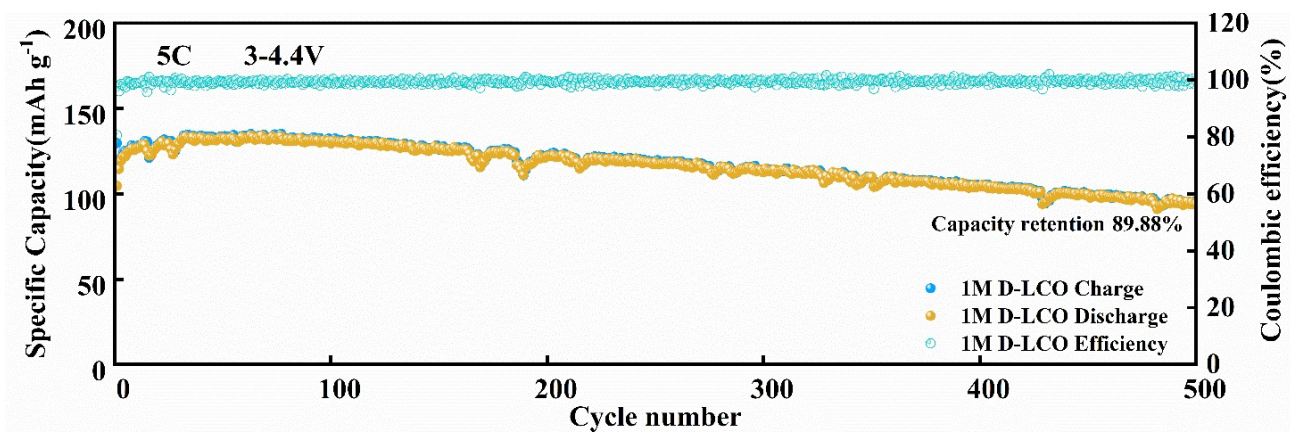

**Fig. S6.** The discharge capacity and coulombic efficiency of 1M D-LCO|TMPTMA-HDDA/LLZTO|Li cell for 500 cycles at 2.8-4.4 V at 5 C.

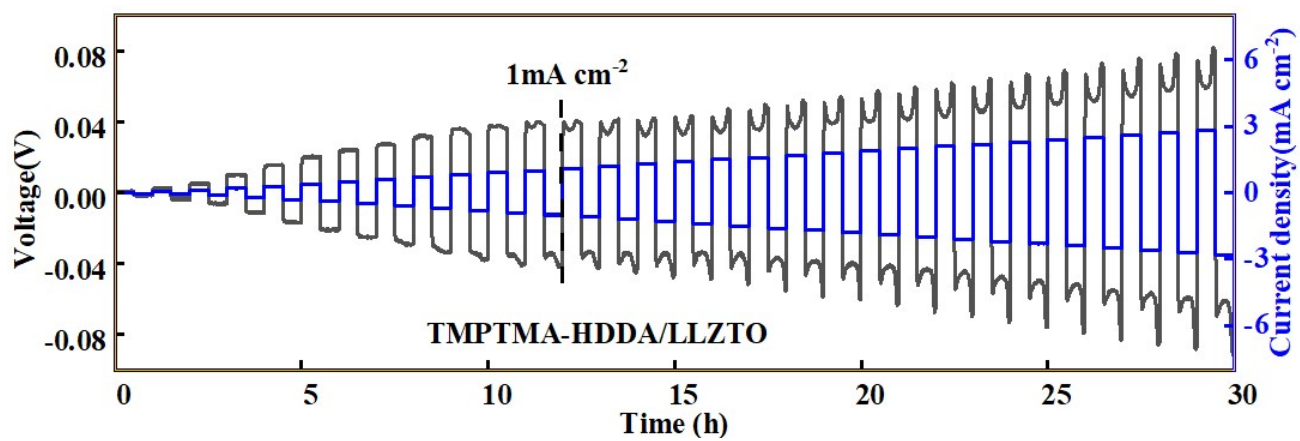

**Fig. S7.** The critical current density of the TMPTMA-HDDA/LLZTO.



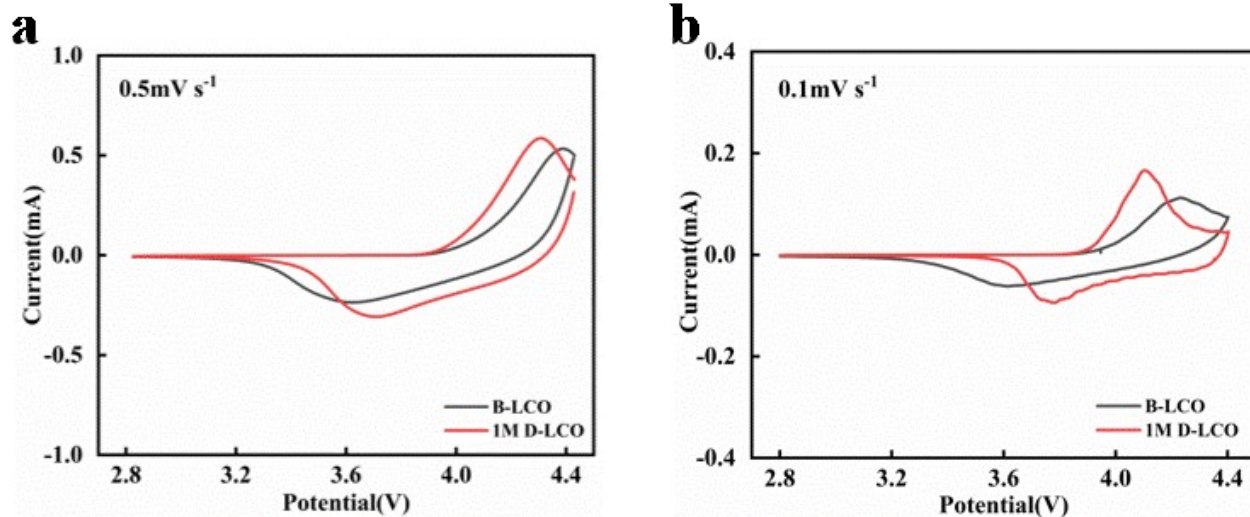

**Fig. S8.** (a) CV curves of B-LCO and 1M D-LCO at 0.5 mV s<sup>-1</sup>. (b) CV curves of B-LCO and 1M D-LCO at 0.1 mV s<sup>-1</sup> after cycling .

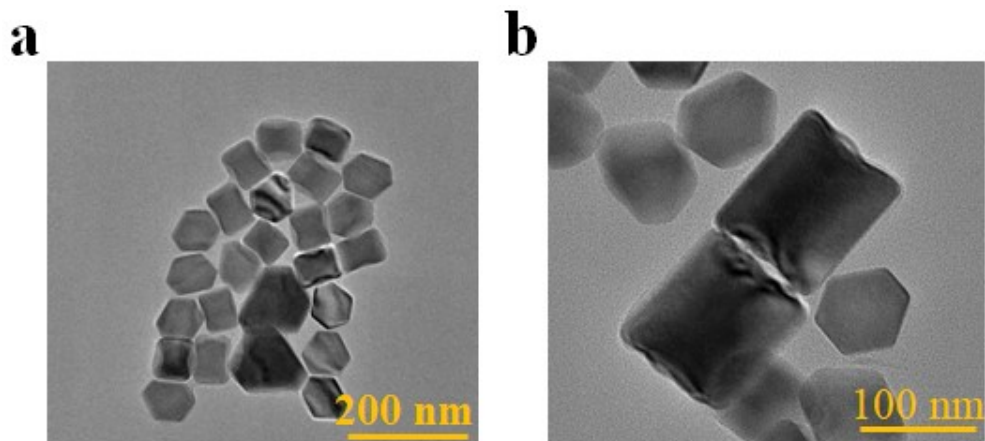

**Fig. S9.** (a, b) TEM images of 1M D-LCO after cycling.

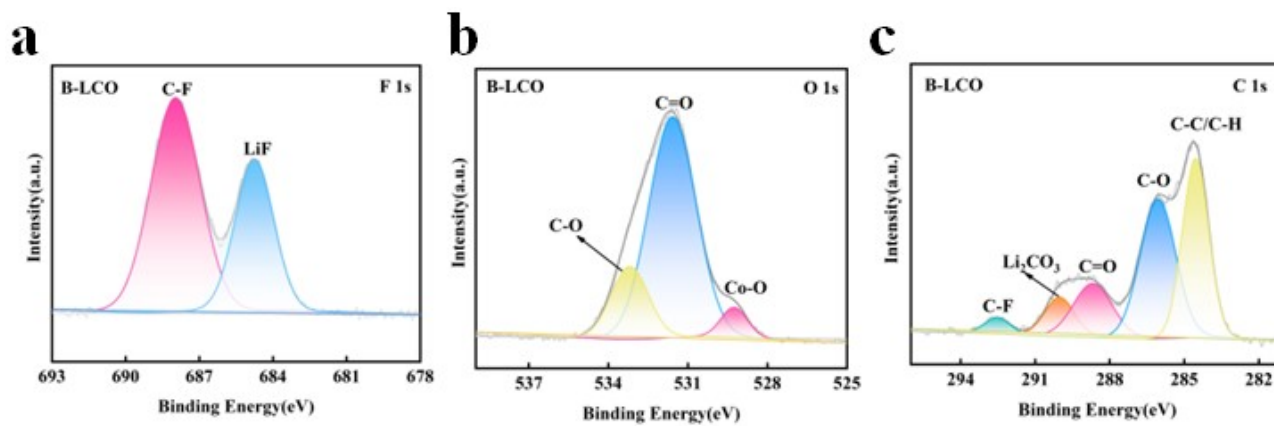

**Fig. S10.** XPS spectra of the B-LCO after cycling (a) F 1s, (b) O 1s and (c) C 1s.

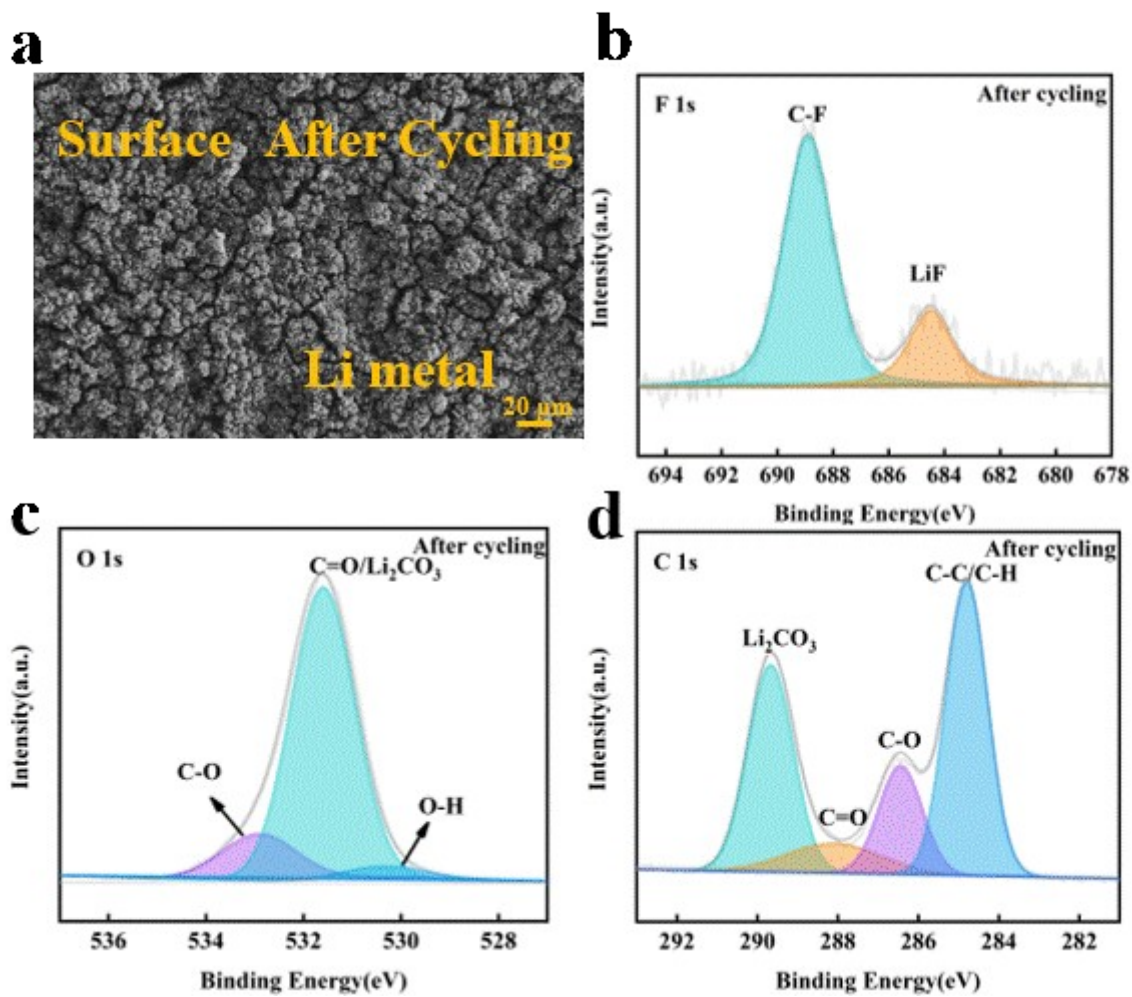

**Fig. S11.** (a) The surface SEM images, and XPS analysis of (b) F 1s, (c) O 1s, (d) C 1s of Li metal anode after cycling.

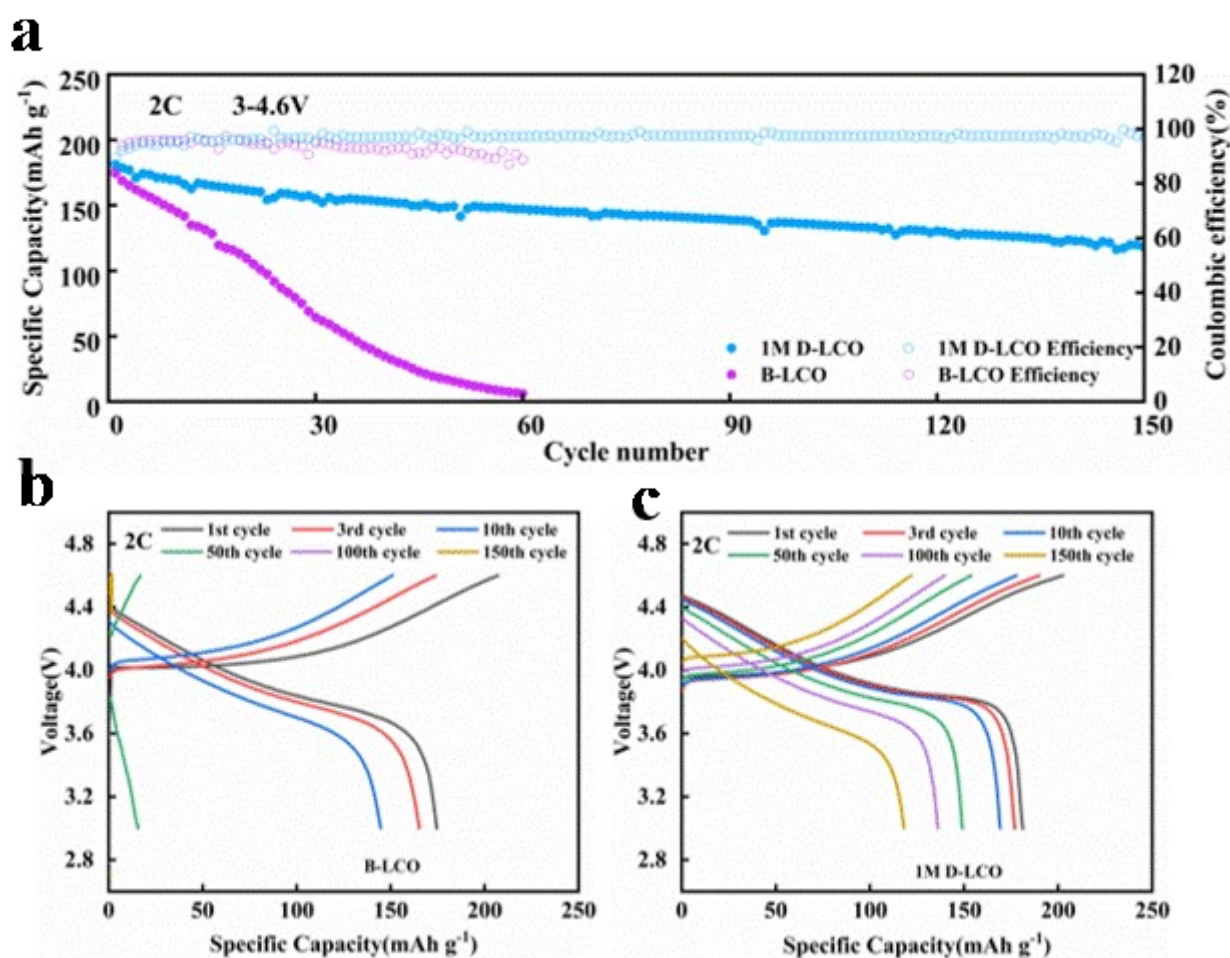

**Fig. S12.** (a) Cycling performance of the B-LCO|TMPTMA-HDDA/LLZTO|Li, 1M D-LCO|TMPTMA-HDDA/LLZTO|Li, cells for 150 cycles at 2 C in the voltage range of 3.0-4.6 V and the corresponding charge-discharge curves of (b) B-LCO|TMPTMA-HDDA/LLZTO|Li, and (c) 1M D-LCO|TMPTMA-HDDA/LLZTO|Li cells during cycling at 2 C.

**Tab. S1 Comparison of electrochemical performance of matched high-voltage LCO cathode cell**

| Modified Cathode                                       | Volatge (V vs Li/Li <sup>+</sup> ) | Current density | Discharge capacity (mAh g <sup>-1</sup> ) | Capacity retention             | Cell                                 | Reference        |
|--------------------------------------------------------|------------------------------------|-----------------|-------------------------------------------|--------------------------------|--------------------------------------|------------------|
| PECA-LCO                                               | 2.5-4.45                           | /               | 172.8                                     | /                              | PECA-LCO PEO-LiDFOB Li               | 1                |
| PMA-LiTFSI-LCO                                         | 2.5-4.25                           | 0.2 C           | 119                                       | 91.2%/100 <sup>th</sup>        | LCO PEO-LiTFSI/PMA-LiTFSI Li         | 2                |
| 0.5%PAA-LCO                                            | 3-4.3                              | 0.05 C          | 150.2                                     | 83.33%/90 <sup>th</sup>        | 0.5%PAA-LCO PEO-based SSE Li         | 3                |
| LCO                                                    | 2.75-4.3                           | 0.5 C           | 140                                       | 87.2/350 <sup>th</sup>         | LCO CSPE Li                          | 4                |
| PEO/LiDFOB-LCO                                         | 3-4.2                              | 0.2 C           | 125                                       | 75%/100 <sup>th</sup>          | D-PEO PEO-LiTFSI Li                  | 5                |
| LaPO <sub>4</sub> /Al <sub>2</sub> O <sub>3</sub> -LCO | 3-4.6                              | 1 C             | /                                         | 87%/200 <sup>th</sup>          | LIBs                                 | 6                |
| <b>PVC/LiDFOB-LCO</b>                                  | <b>2.8-4.4</b>                     | <b>2 C</b>      | <b>141.2</b>                              | <b>83.57%/500<sup>th</sup></b> | <b>1M D-LCO TMPTMA-HDDA/LLZTO Li</b> | <b>This work</b> |



## Reference

- 1 J. Ma, Z. Liu, B. Chen, L. Wang, L. Yue, H. Liu, J. Zhang, Z. Liu, G. Cui, A Strategy to Make High Voltage LiCoO<sub>2</sub> Compatible with polyethylene oxide electrolyte in all-solid-state lithium ion batteries, *J. Electrochem. Soc.* 2017, **164**, A3454–A3461.
- 2 W. Zhou, Z. Wang, Y. Pu, Y. Li, S. Xin, X. Li, J. Chen, J.B. Goodenough, Double-layer polymer electrolyte for high-voltage all-solid-state rechargeable batteries, *Adv. Mater.*, 2019, **31**, 1–7.
- 3 Q. Zhang, N. Zhang, T. Yu, J. Zhang, B. Wen, L. Zhang, High-performance PEO-based solid-state LiCoO<sub>2</sub> lithium metal battery enabled by poly(acrylic acid) artificial cathode electrolyte interface, *Mater. Today Energy*, 2022, **29**, 101128.
- 4 Z. Li, Q. Liu, Y. Deng, M. Zhou, W. Tang, H. Dong, W. Zhao, R. Liu, In situ cross-linked plastic crystal electrolytes toward superior lithium metal batteries, *Mater. Today Energy*. 2023, **31**, 101198.
- 5 Q. Han, S. Wang, W. Kong, W. Ren, Y. Liu, H. Wang, Realizing compatibility of high voltage cathode and poly (ethylene oxide) electrolyte in all-solid-state lithium batteries by bilayer electrolyte design, *Chem. Eng. J.*, 2023, **454**, 140104.
- 6 Y. Zou, Y. Xiao, Y. Tang, Y. Cheng, S. Sun, M. Wang, Y. Yang, J. Zheng, Synergetic LaPO<sub>4</sub> and Al<sub>2</sub>O<sub>3</sub> hybrid coating strengthens the interfacial stability of LiCoO<sub>2</sub> at 4.6 V, *J. Power Sources*, 2023, **555**, 232409.
